# Supplementary material for: Multi-omics reveals that gut microbiota-derived taurodeoxycholic acid mediates the protective effect of Lactobacillus rhamnosus GG against LPS-induced liver injury
Source: Royal Society of Chemistry journal article supplement (doi:10.1039/d5fo05530j), 2026-01-01
Supplement: d5fo05530j1.pdf [file d5fo05530j1.pdf]

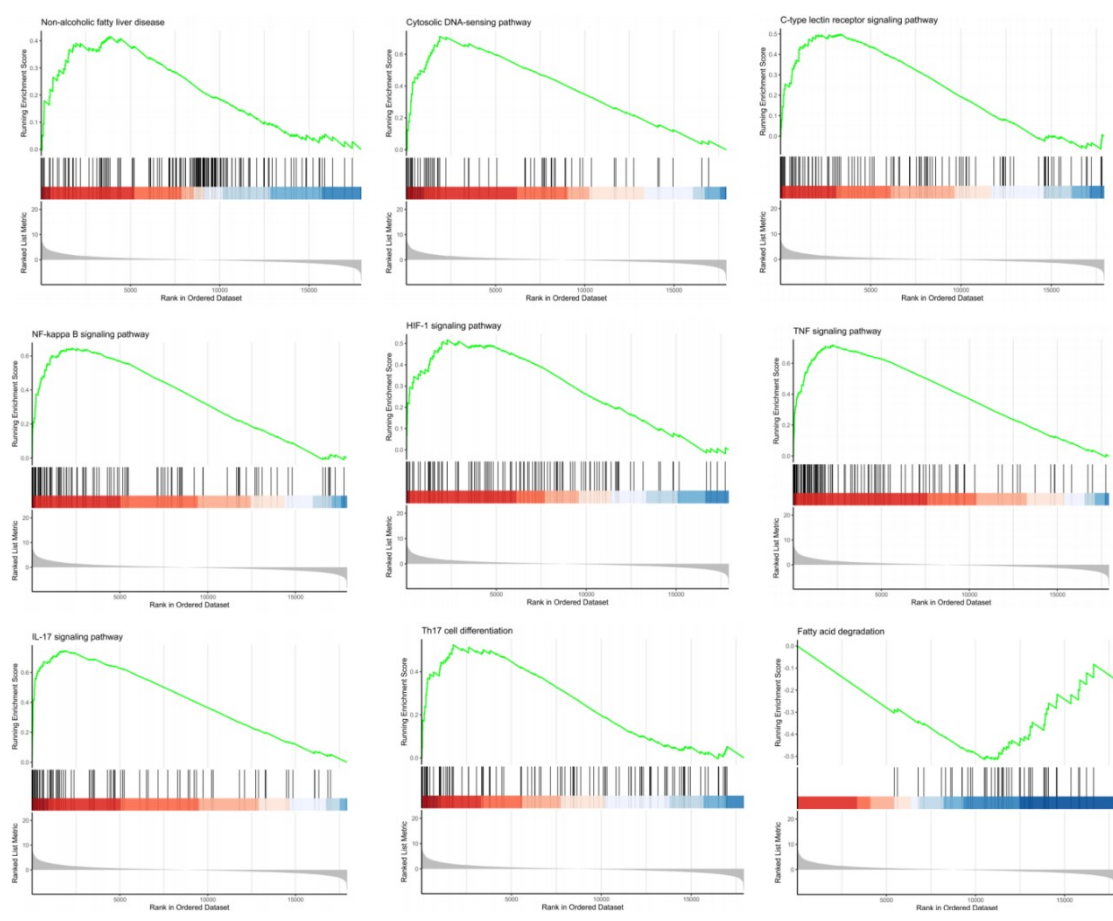

Supplementary Figure 1

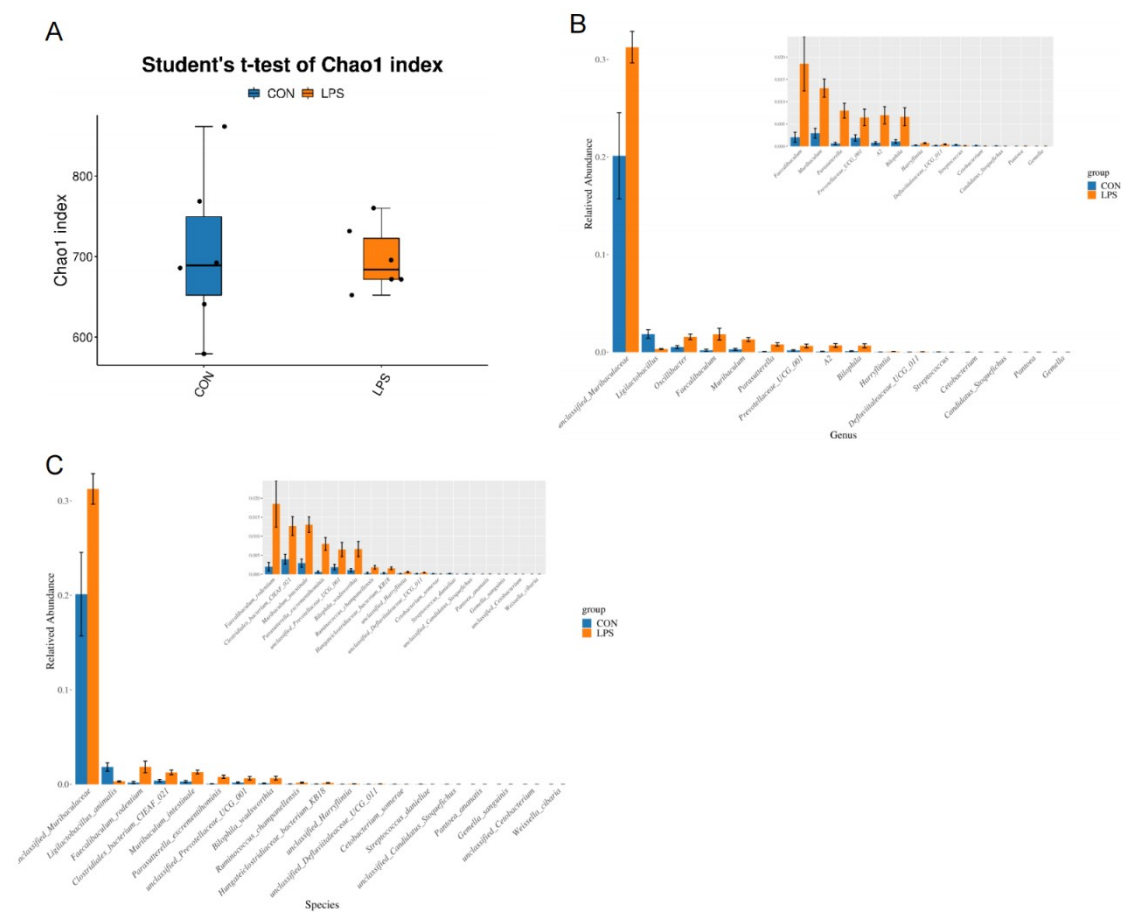

Supplementary Figure 2

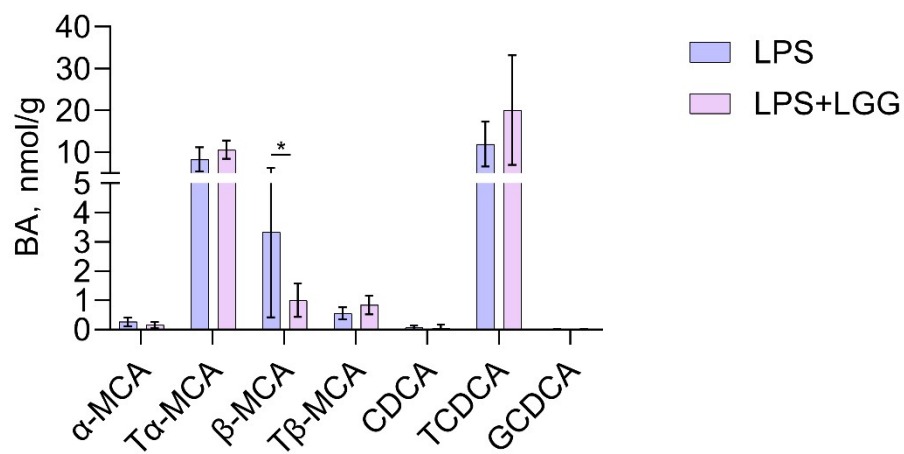

Supplementa

ry Figure 3

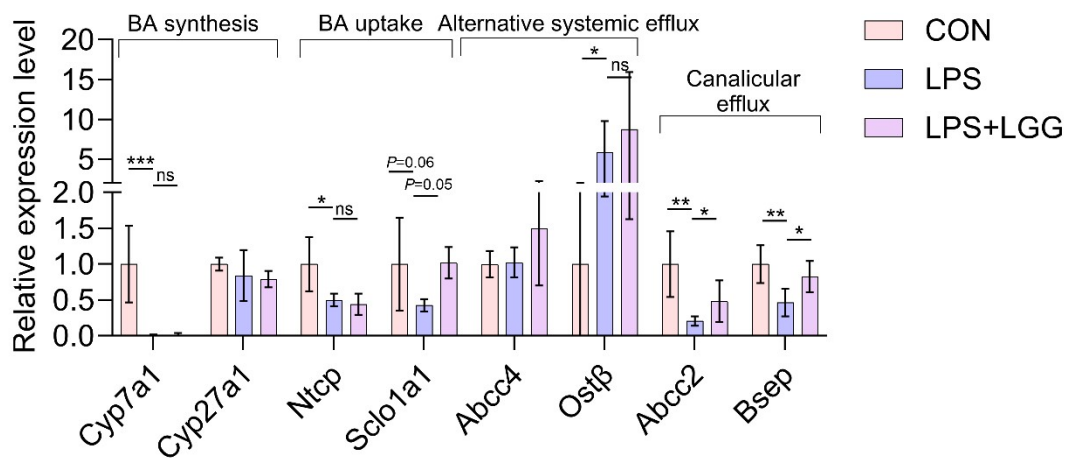

Supplementary Figure 4

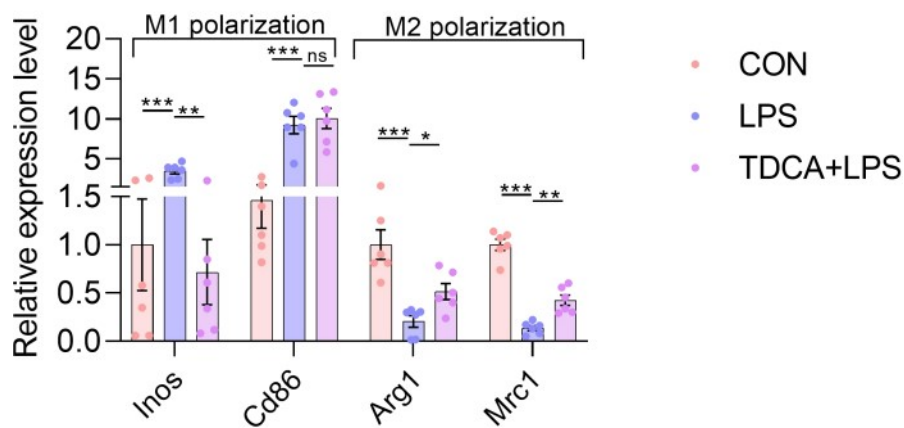

Supplementary Figure 5

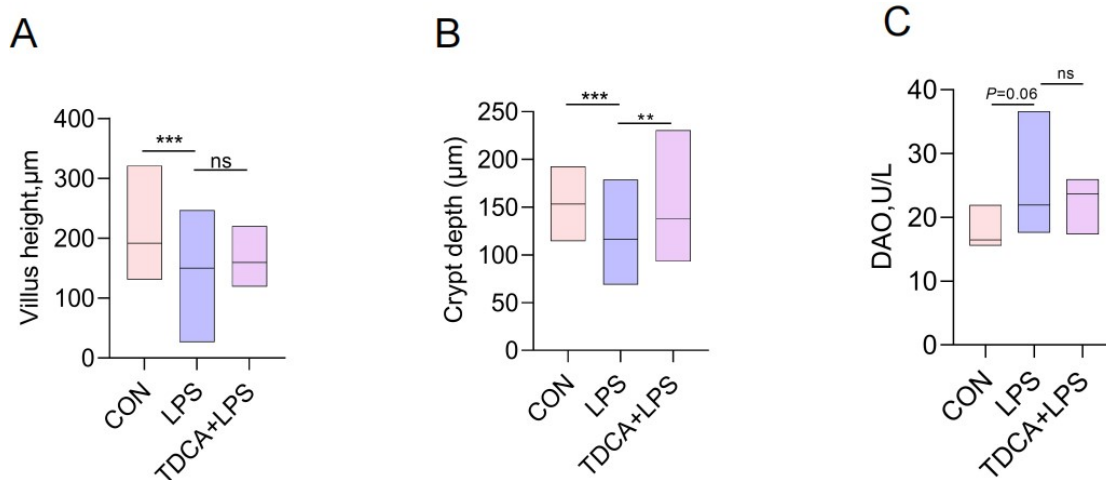

Supplementary Figure 6

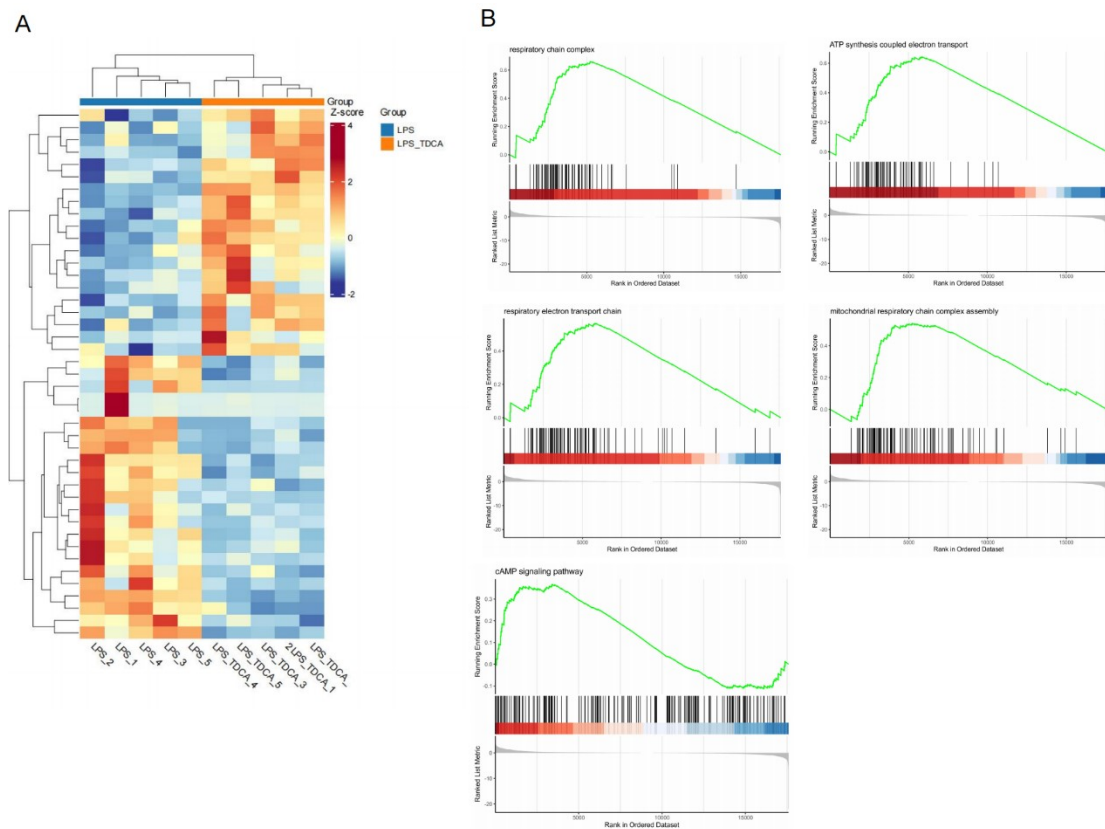

Supplementary Figure 7

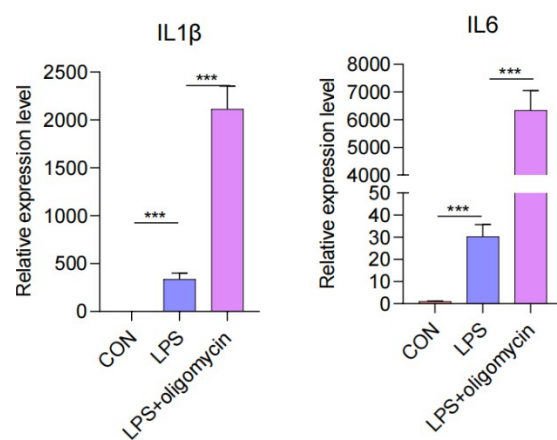

Supplementary Figure 8
